# Supplementary material for: SARS-CoV-2 Sero-Surveillance in Greece: Evolution over Time and Epidemiological Attributes during the Pre-Vaccination Pandemic Era
Source: MDPI journal article supplement (doi:10.3390/diagnostics12020295), 2022-01-25
Supplement: s1 [file s1]

**Table ST1.** Anti-SARS-CoV-2 IgG antibody seroprevalence, Greece, September 2020

| September                                                |        | Positive/<br>sample<br>size | S1: Crude prevalence            |            | S2: Age, sex and<br>population-adjusted<br>prevalence |           | S3: S2 + adjustment<br>for sensitivity and<br>specificity |           | S4: S3 + NPHO data              |           |
|----------------------------------------------------------|--------|-----------------------------|---------------------------------|------------|-------------------------------------------------------|-----------|-----------------------------------------------------------|-----------|---------------------------------|-----------|
|                                                          |        | n/N                         | Prevalence<br>(%)               | 95% CI     | Prevalence (%)                                        | 95% CI    | Prevalence (%)                                            | 95% CI    | Prevalence (%)                  | 95% CI    |
| <b>Total</b>                                             |        | 59/7789                     | 0,76                            | 0.56–0.95  | 1,11                                                  | 0.75-1.48 | 0,97                                                      | 0.53-1.41 | 1,15                            | 0.71-1.59 |
| <b>Age<br/>group<br/>(years)</b>                         | 0–29   | 13/1935                     | 0,67                            | 0.31-1.04  | 1,06                                                  | 0.38-1.75 | 0,91                                                      | 0.09-1.73 | 1,06                            | 0.24-1.88 |
|                                                          | 30–49  | 20/2186                     | 0,91                            | 0.52 -1.31 | 1,1                                                   | 0.42-1.77 | 0,95                                                      | 0.14-1.76 | 1,16                            | 0.35-1.97 |
|                                                          | 50–69  | 12/2121                     | 0,57                            | 0.25-0.88  | 0,84                                                  | 0.21-1.47 | 0,65                                                      | 0.00-1.40 | 0,83                            | 0.18-1.58 |
|                                                          | ≥ 70   | 14/1547                     | 0,9                             | 0.43-1.38  | 1,69                                                  | 0.48-2.90 | 1,67                                                      | 0.22-3.11 | 1,78                            | 0.33-3.22 |
| <b>Sex</b>                                               | Male   | 25/3043                     | 0,82                            | 0.50-1.14  | 1,05                                                  | 0.49-1.61 | 0,89                                                      | 0.22-1.57 | 1,09                            | 0.41-1.76 |
|                                                          | Female | 35/4746                     | 0,72                            | 0.48-0.96  | 1,17                                                  | 0.68-1.67 | 1,04                                                      | 0.46-1.63 | 1,19                            | 0.60-1.78 |
| <b>‘N-1’ chi-squared test<br/>Difference between sex</b> |        |                             | Difference = 0.10%<br>p = 0.620 |            | Difference = 0.12%<br>p = 0.624                       |           | Difference = 0.15%<br>p = 0.512                           |           | Difference = 0.10%<br>p = 0.686 |           |

**Table ST2. Anti-SARS-CoV-2 IgG antibody seroprevalence, Greece, October 2020**

| October                                          |        | Positive/<br>sample<br>size | S1: Crude prevalence           |           | S2: Age, sex and<br>population-adjusted<br>prevalence |           | S3: S2 + adjustment for<br>sensitivity and<br>specificity |           | S4: S3 + NPHO data             |  |
|--------------------------------------------------|--------|-----------------------------|--------------------------------|-----------|-------------------------------------------------------|-----------|-----------------------------------------------------------|-----------|--------------------------------|--|
|                                                  |        | n/N                         | Prevalence<br>(%)              | 95% CI    | Prevalence<br>(%)                                     | 95% CI    | Prevalence<br>(%)                                         | 95% CI    | Prevalence<br>(%)              |  |
| Total                                            |        | 78/8160                     | 0.96                           | 0.74-1.17 | 1.81                                                  | 1.37-2.25 | 1.80                                                      | 1.28–2.33 | 2.16                           |  |
| Age<br>group<br>(years)                          | 0–29   | 13/1630                     | 0.80                           | 0.37-1.23 | 2.87                                                  | 1.76-3.98 | 3.07                                                      | 1.74-4.40 | 3.40                           |  |
|                                                  | 30–49  | 30/2342                     | 1.28                           | 0.83-1.74 | 1.64                                                  | 0.87-2.41 | 1.60                                                      | 0.68-2.52 | 2.04                           |  |
|                                                  | 50–69  | 25/2292                     | 1.09                           | 0.67-1.52 | 1.59                                                  | 0.76-2.41 | 1.54                                                      | 0.56-2.52 | 1.91                           |  |
|                                                  | ≥ 70   | 10/1896                     | 0.53                           | 0.20-0.85 | 0.19                                                  | 0-0.56    | 0.00                                                      | 0.00-0.31 | 0.08                           |  |
| Sex                                              | Male   | 41/3401                     | 1.21                           | 0.84-1.57 | 2.92                                                  | 2.08-3.75 | 3.12                                                      | 2.13-4.12 | 3.51                           |  |
|                                                  | Female | 37/4759                     | 0.78                           | 0.53-1.03 | 0.75                                                  | 0.38-1.13 | 0.54                                                      | 0.09-1.00 | 0.86                           |  |
| 'N-1' chi-squared test<br>Difference between sex |        |                             | Difference = 0.43%<br>p = 0.05 |           | Difference = 2.17%<br>p <0.001                        |           | Difference = 2.58%<br>p <0.001                            |           | Difference = 2.65%<br>p <0.001 |  |

**Table ST3.** Anti-SARS-CoV-2 IgG antibody seroprevalence, Greece, November 2020

| November                                                 |        | Positive/<br>sample<br>size | S1: Crude prevalence            |            | S2: Age, sex and<br>population-adjusted<br>prevalence |           | S3: S2 + adjustment for<br>sensitivity and<br>specificity |           | S4: S3 + NPHO data              |           |
|----------------------------------------------------------|--------|-----------------------------|---------------------------------|------------|-------------------------------------------------------|-----------|-----------------------------------------------------------|-----------|---------------------------------|-----------|
|                                                          |        | n/N                         | Prevalence<br>(%)               | 95% CI     | Prevalence<br>(%)                                     | 95% CI    | Prevalence<br>(%)                                         | 95% CI    | Prevalence<br>(%)               | 95% CI    |
| <b>Total</b>                                             |        | 164/7069                    | 2.32                            | 1.97–2.67  | 3.06                                                  | 2.40-3.72 | 3.30                                                      | 2.51-4.09 | 4.28                            | 3.49-5.07 |
| <b>Age<br/>group<br/>(years)</b>                         | 0–29   | 40/1456                     | 2.75                            | 1.91-3.59  | 2.37                                                  | 1.06-3.68 | 2.47                                                      | 0.90-4.04 | 3.25                            | 1.68-4.82 |
|                                                          | 30–49  | 58/2108                     | 2.75                            | 2.05 -3.45 | 4.03                                                  | 2.59-5.47 | 4.45                                                      | 2.73-6.17 | 5.61                            | 3.89-7.33 |
|                                                          | 50–69  | 44/2057                     | 2.14                            | 1.51-2.76  | 3.37                                                  | 2.17-4.57 | 3.67                                                      | 2.23-5.10 | 4.82                            | 3.38-6.26 |
|                                                          | ≥ 70   | 22/1448                     | 1.52                            | 0.89-2.15  | 2.11                                                  | 0.73-3.48 | 2.16                                                      | 0.52-3.80 | 2.95                            | 1.31-4.59 |
| <b>Sex</b>                                               | Male   | 78/2975                     | 2.62                            | 2.05-3.20  | 3.62                                                  | 2.50-4.73 | 3.96                                                      | 2.63-5.30 | 5.02                            | 3.69-6.35 |
|                                                          | Female | 86/4094                     | 2.10                            | 1.66-2.54  | 2.52                                                  | 1.73-3.31 | 2.65                                                      | 1.70-3.60 | 3.59                            | 2.64-4.54 |
| <b>‘N-1’ chi-squared test<br/>Difference between sex</b> |        |                             | Difference = 0.52%<br>p = 0.152 |            | Difference = 1.10%<br>p = 0.007                       |           | Difference = 1.31%<br>p = 0.002                           |           | Difference = 1.43%<br>p = 0.003 |           |

**Table ST4.** Anti-SARS-CoV-2 IgG antibody seroprevalence, Greece, December 2020

| December                                         |        | Positive/<br>sample<br>size | S1: Crude prevalence            |            | S2: Age, sex and<br>population-adjusted<br>prevalence |            | S3: S2 + adjustment for<br>sensitivity and<br>specificity |            | S4: S3 + NPHO data              |            |
|--------------------------------------------------|--------|-----------------------------|---------------------------------|------------|-------------------------------------------------------|------------|-----------------------------------------------------------|------------|---------------------------------|------------|
|                                                  |        | n/N                         | Prevalence<br>(%)               | 95% CI     | Prevalence<br>(%)                                     | 95% CI     | Prevalence<br>(%)                                         | 95% CI     | Prevalence<br>(%)               | 95% CI     |
| Total                                            |        | 321/6231                    | 5.15                            | 4.60-5.70  | 7.91                                                  | 6.70-9.13  | 9.09                                                      | 7.64-10.55 | 10.40                           | 8.95-11.85 |
| Age<br>group<br>(years)                          | 0–29   | 79/1336                     | 5.91                            | 4.65-7.18  | 10.09                                                 | 7.46-12.73 | 11.70                                                     | 8.56-14.85 | 12.67                           | 9.52-15.81 |
|                                                  | 30–49  | 108/1847                    | 5.85                            | 4.78 -6.92 | 8.05                                                  | 5.76-10.34 | 9.26                                                      | 6.52-12.00 | 10.77                           | 8.03-13.50 |
|                                                  | 50–69  | 98/1729                     | 5.67                            | 4.58-6.76  | 7.11                                                  | 4.93-9.30  | 8.14                                                      | 5.54-10.75 | 9.72                            | 7.11-12.32 |
|                                                  | ≥ 70   | 36/1319                     | 2.73                            | 1.85-3.61  | 4.13                                                  | 1.74-6.51  | 4.57                                                      | 1.72-7.42  | 5.75                            | 2.90-8.61  |
| Sex                                              | Male   | 130/2671                    | 4.87                            | 4.05-5.68  | 7.56                                                  | 5.65-9.46  | 8.67                                                      | 6.39-10.94 | 10.05                           | 7.78-12.33 |
|                                                  | Female | 191/3560                    | 5.37                            | 4.62-6.11  | 8.24                                                  | 6.64-9.85  | 9.49                                                      | 7.58-11.41 | 10.76                           | 8.85-12.68 |
| 'N-1' chi-squared test<br>Difference between sex |        |                             | Difference = 0.50%<br>p = 0.377 |            | Difference = 0.68%<br>p = 0.326                       |            | Difference = 0.82%<br>p = 0.226                           |            | Difference = 0.71%<br>p = 0.365 |            |

**Table ST5: Infection Fatality rates(deaths per 1,000 infections) for each month calculated by using different estimations of seroprevelnce (S1,S2,S3,S4)**

|                  | s1   |                |                | s2   |                |                | S3   |                |                | S4   |                |                |
|------------------|------|----------------|----------------|------|----------------|----------------|------|----------------|----------------|------|----------------|----------------|
|                  | IFR  | LOWER<br>LIMIT | UPPER<br>LIMIT |
| <b>APRIL</b>     | 3,10 | 2,13           | 5,65           | 2,65 | 1,86           | 4,48           | 5,65 | 2,71           | -              | 5,20 | 2,60           | 65,00          |
| <b>MAY</b>       | 2,75 | 2,32           | 4,60           | 2,11 | 1,65           | 4,47           | 4,15 | 2,15           | 45,59          | 3,68 | 2,03           | 20,46          |
| <b>JUNE</b>      | 2,78 | 2,23           | 4,71           | 2,22 | 1,62           | 5,37           | 6,46 | 2,67           | 51,28          | 4,67 | 2,14           | 25,61          |
| <b>JULY</b>      | 2,18 | 1,74           | 3,56           | 1,94 | 1,41           | 4,22           | 5,31 | 2,45           | 54,13          | 3,85 | 1,86           | 24,88          |
| <b>AUGUST</b>    | 2,39 | 1,73           | 4,57           | 2,13 | 1,50           | 4,71           | 5,51 | 2,81           | 71,23          | 3,75 | 1,88           | 20,94          |
| <b>SEPTEMBER</b> | 2,57 | 2,03           | 3,94           | 1,96 | 1,46           | 4,34           | 3,16 | 2,05           | 6,55           | 2,36 | 1,53           | 4,66           |
| <b>OCTOBER</b>   | 3,16 | 2,54           | 4,56           | 2,01 | 1,57           | 3,14           | 2,75 | 2,01           | 4,23           | 2,00 | 1,37           | 3,02           |
| <b>NOVEMBER</b>  | 6,54 | 5,53           | 8,33           | 5,07 | 4,03           | 7,32           | 5,91 | 4,58           | 8,25           | 4,20 | 3,32           | 5,60           |
| <b>DECEMBER</b>  | 6,38 | 5,70           | 7,39           | 4,45 | 3,80           | 5,55           | 4,51 | 3,82           | 5,49           | 3,67 | 3,13           | 4,40           |
