# Supplementary material for: SARS-CoV-2 Sero-Surveillance in Greece: Evolution over Time and Epidemiological Attributes during the Pre-Vaccination Pandemic Era
Source: MDPI journal article supplement (doi:10.3390/diagnostics12020295), 2022-01-25
Supplement: s1 [file s1]

**Figure SF2: Ratio of Infected individuals to reported cases during the study period.**

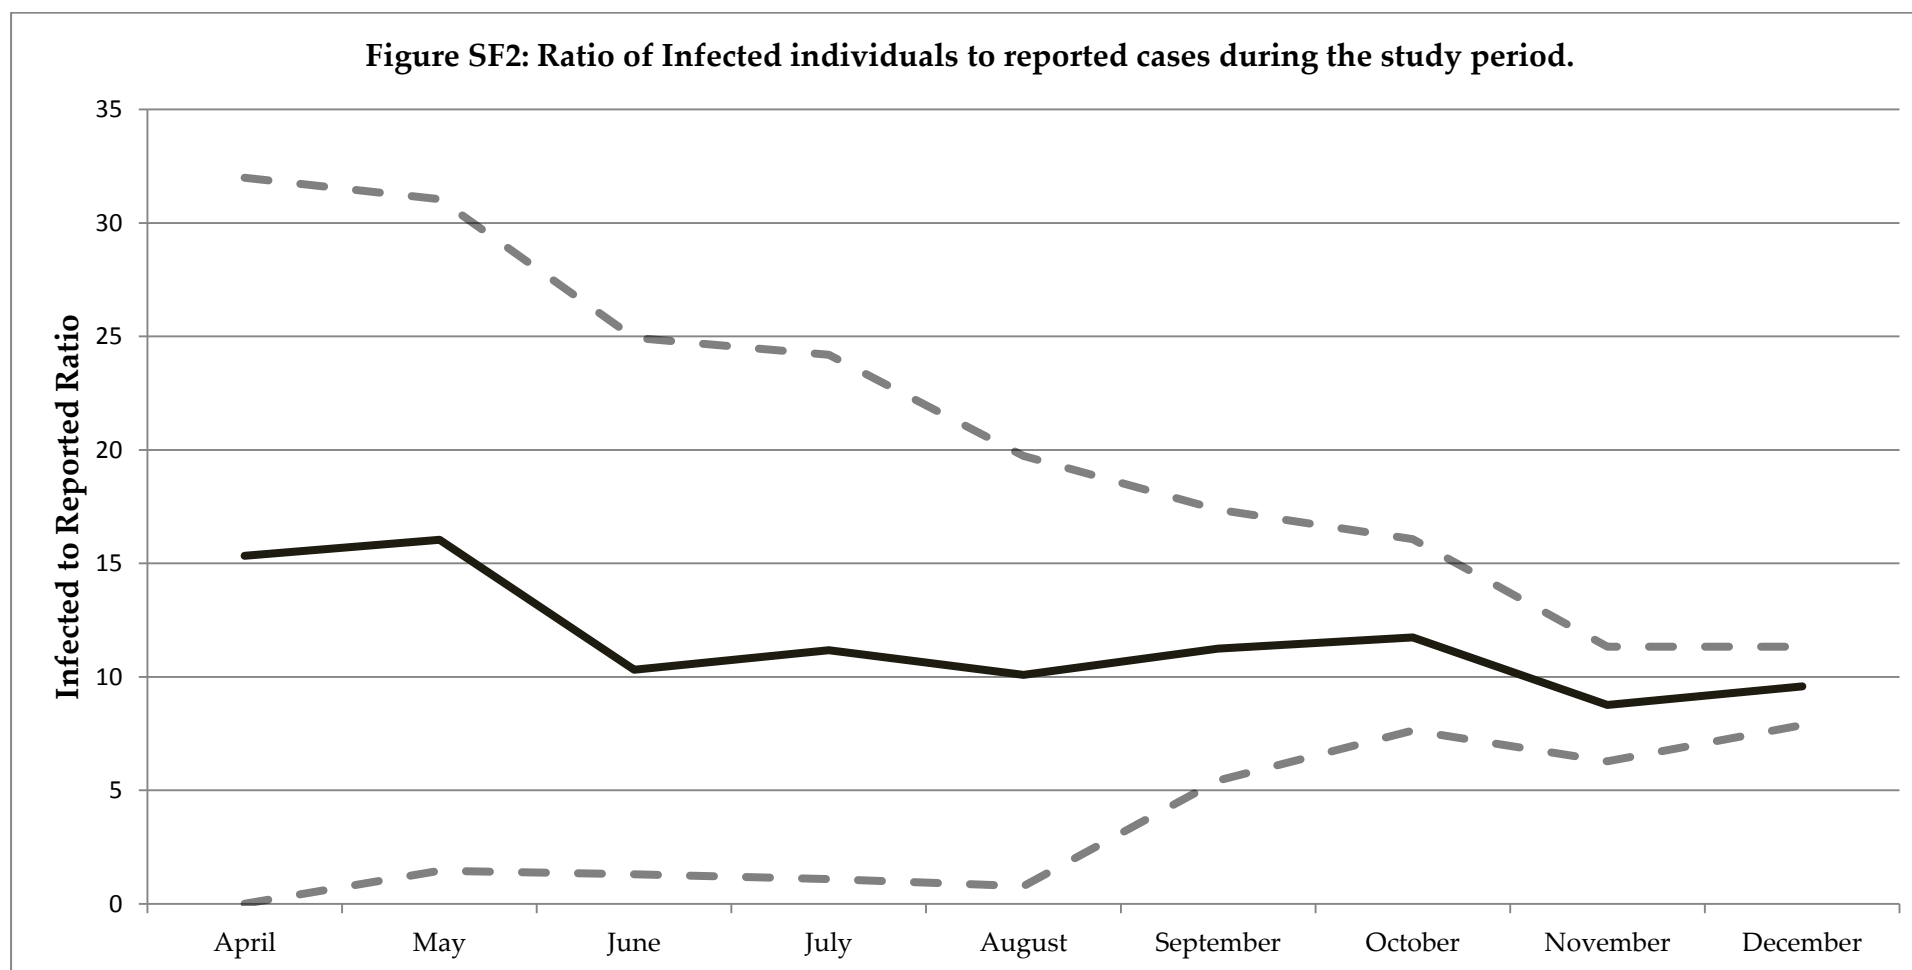

*Dashed lines represent the high and low 95% Confidence intervals*
