# Supplementary figures and images for: SARS-CoV-2 Sero-Surveillance in Greece: Evolution over Time and Epidemiological Attributes during the Pre-Vaccination Pandemic Era
Source: MDPI journal article supplement (doi:10.3390/diagnostics12020295), 2022-01-25

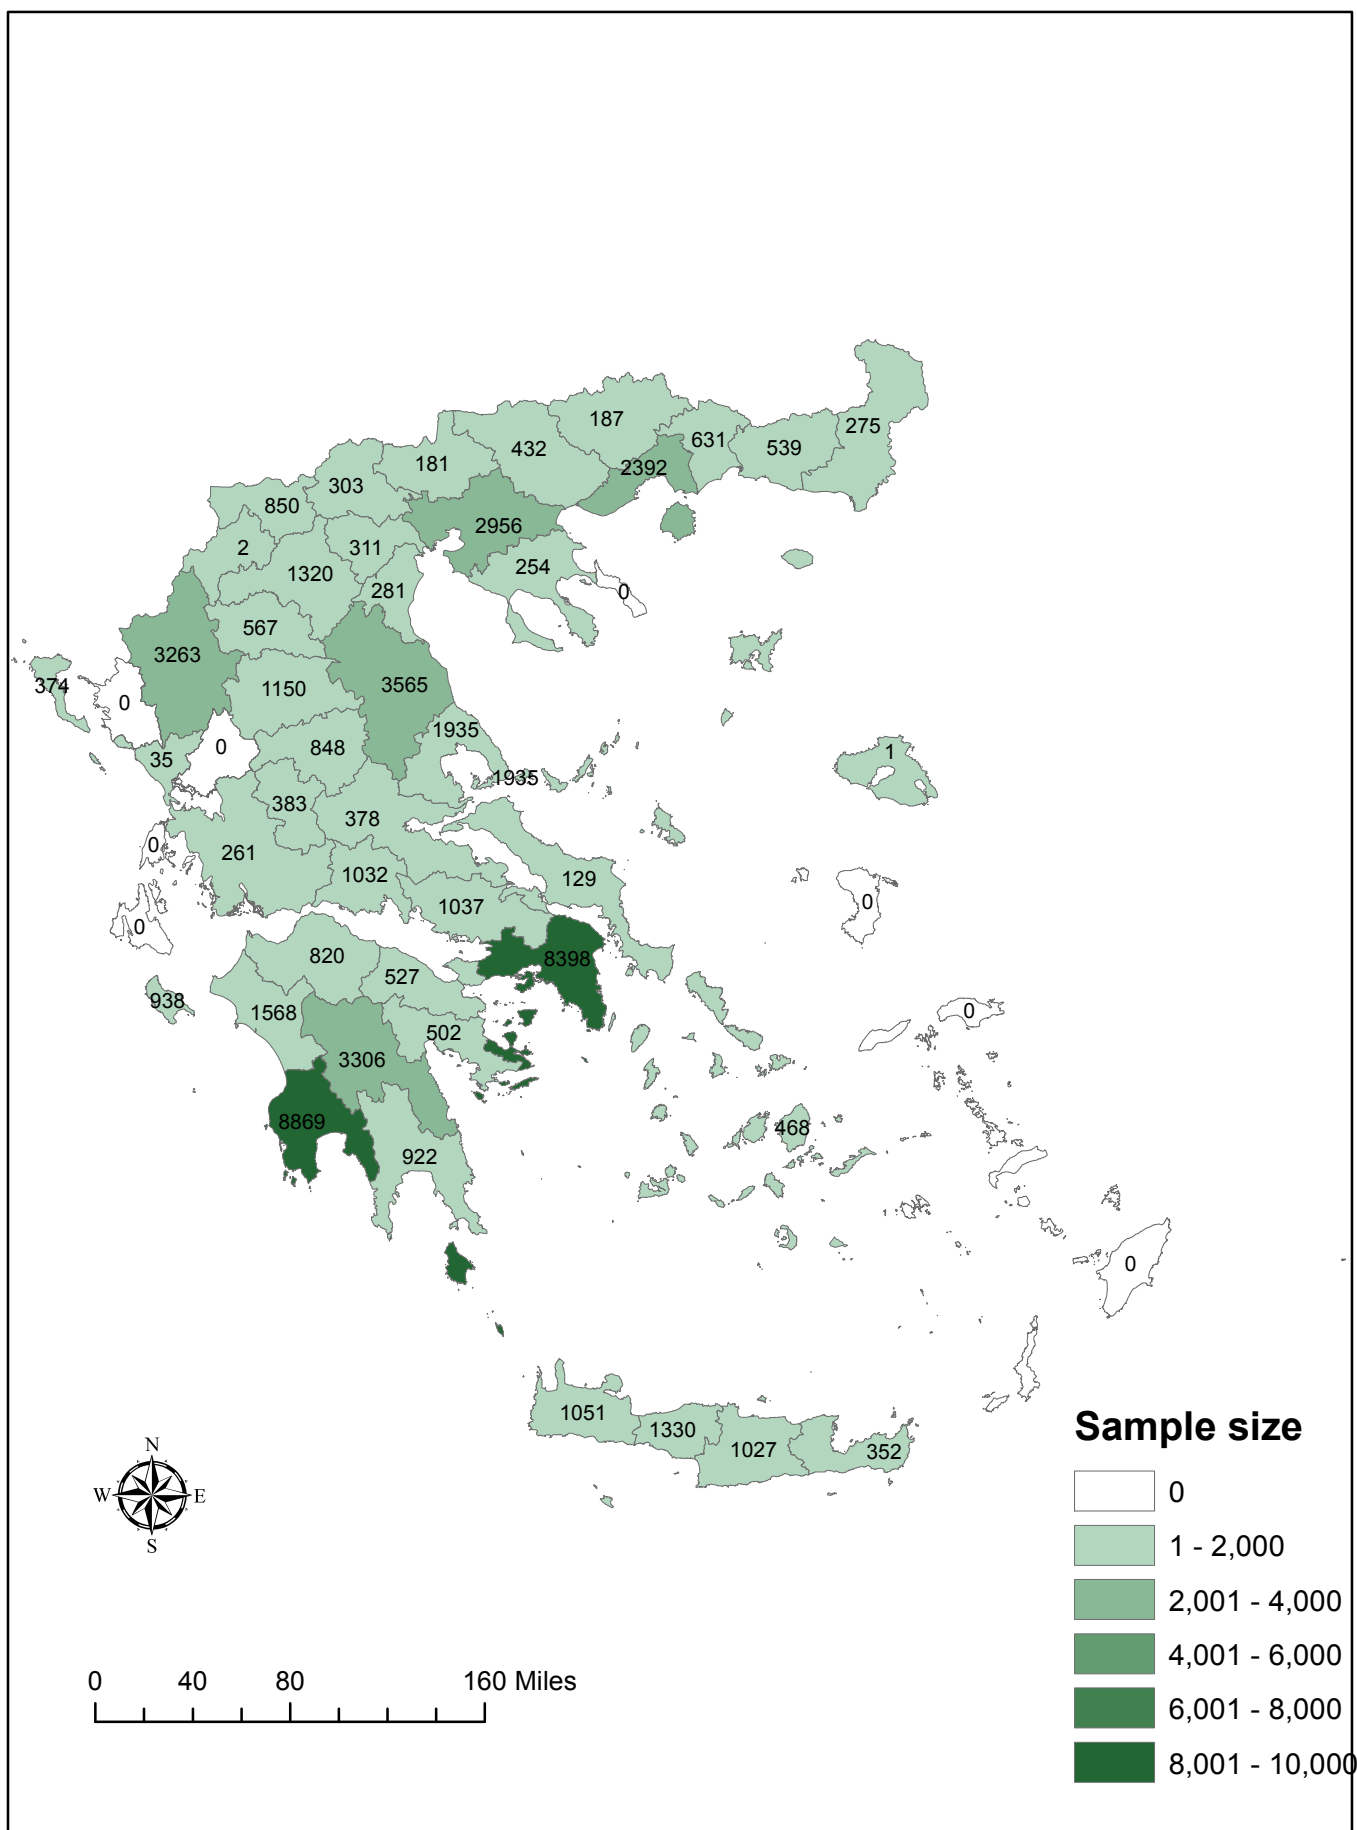

Supplement: s1 [file s1]
